# Supplementary material
Source: PubMed Central journal article supplement (PMC4270630)
Supplement: ijcep0007-7610-f4.pdf [file ijcep0007-7610-f4.pdf]

## Tertiary lymphoid structures and immune cell infiltration in Merkel cell carcinomas

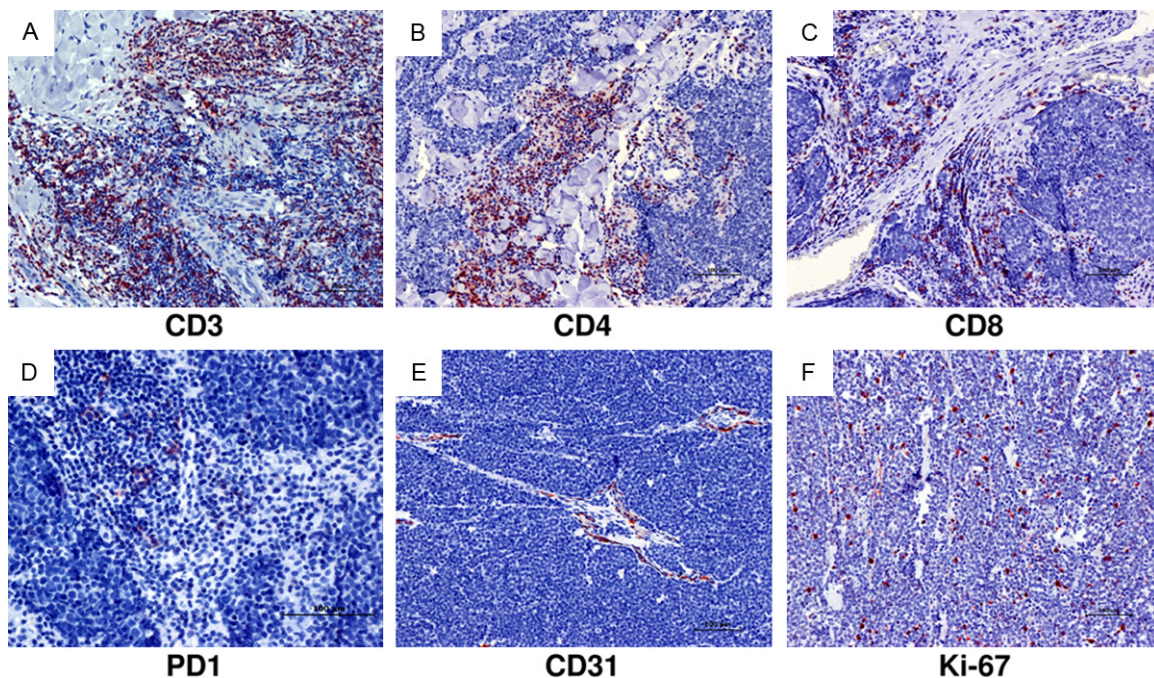

**Figure S1.** Exemplary immunohistochemical stainings of MCCs for (A) CD3, (B) CD4, (C) CD8, (D) PD-1, (E) CD31, (F) Ki67.

**Table S1.** Immune cell infiltration in MCCs

|                               | Mean (SD) | Median (IQR 25, 75) | Min-Max |
|-------------------------------|-----------|---------------------|---------|
| CD3 [cells/mm <sup>2</sup> ]  | 135 (393) | 16 (6, 72)          | 0-1764  |
| CD4 [cells/mm <sup>2</sup> ]  | 135 (482) | 18 (0, 53)          | 0-2175  |
| CD8 [cells/mm <sup>2</sup> ]  | 172 (302) | 25 (6, 253)         | 0-1188  |
| CD68 [cells/mm <sup>2</sup> ] | 182 (121) | 137 (109, 232)      | 16-534  |
| CD31 [cells/mm <sup>2</sup> ] | 47 (55)   | 29 (25, 45)         | 18-278  |
| Ki67 [%]                      | 14 (10)   | 13 (5, 20)          | 3-30    |
